# Supplementary material
Source: Royal Society of Chemistry journal article supplement (https://www.rsc.org/suppdata/cp/1999/1517/808664h.doc)
Supplement: Supplementary file 1 [file 808664h.doc]

**Supplementary Material**

Figure 1s - SAXS patterns from equimolar mixtures of CnH2n+2:C36D74 for i) *n* = 31, ii) *n* = 30, iii) *n* = 27 and iv) *n* = 26, immediately on quenching (dotted line) and aged for between three and four weeks (continuous line).

Figure 3s - SANS from *n* = 28 quenched to i) 10˚C and ii) 20˚C and iii) *n* = 30 quenched to 20˚C. Normalised patterns are shown in the insets to i and ii.

Figure 5s - A comparison of SANS in the low Q region after long-time aging for 24 ≤ *n* ≤ 30. C24H50:C36D74, C26H54:C36D74 and C28H58:C36D74 aged for five months and C30H62:C36D74 after aging for greater than four years.

Figure 7s - Porod plot for aged 24 ≤ *n* ≤ 30 mixtures. The slope in the low Q region for these systems is less steep than for C20H42:C36D74 and is modified to varying extents by microphase scattering.

Figure 8s - Heating curves for selected 20 ≤ *n* ≤ 34 mixtures. i) *n* = 30; ii) *n* = 29 and iii) *n* = 27, freshly quenched from the melt, aged for ca. 70 days, and after heating aged sample. A magnification of the additional endotherm is shown in the insets. Individual heating scans have been shifted for clarity.

**Figure 1s**

**Figure 1s continued**

**Figure 3s**

**Figure 3s continued**

**Figure 5s**

**Figure 7s**

**Figure 8s**

**Figure 8s continued**

**Table 1s**

|  |  | Manufacturer's Specifications | | | Structure |
| --- | --- | --- | --- | --- | --- |
| Alkane | Formula | Source | Purity  / % | Tmelt  / ˚C |  |
| Eicosane | C20H42 | Fluka | > 97 | 36-38 | T |
| Tetracosane | C24H50 | Fluka | > 99 | 49-51 | T |
| Hexacosane | C26H54 | Aldrich | 99 | 56-58 | T / M |
| Heptacosane | C27H56 | Aldrich | 99 | 59-61 | O |
| Octacosane | C28H58 | Aldrich | 99 | 61-63 | M |
| Nonacosane | C29H60 | Aldrich | 99 | 65-67 | O |
| Triacontane | C30H62 | Aldrich | 99 | 65-67 | M |
| Hentriacontane | C31H64 | TCI | 97 | 66 | O |
| Dotriacontane | C32H66 | Aldrich | 97 | 68-70 | M |
| Tritriacontane | C33H68 | Aldrich | 98 | 71-73 | O |
| Tetratriacontane | C34H70 | Sigma | ca. 98 | - | M |
| Hexatriacontane | C36H74 | Aldrich | 98 | 74-76 | M / O |
| Hexatriacontane-D74 | C36D74 | CIL | 98 | - | M / O |

Table 1s -Alkanes used in the present study. Manufacturers, their specification of purity and melting point, and low temperature crystal structure. T, M and O refer to triclinic, monoclinic and orthorhombic structures respectively.
